# Supplementary material for: Intracerebral haemorrhage in patients taking different types of oral anticoagulants: a pooled individual patient data analysis from two national stroke registries
Source: HighWire-hosted journal article supplement (doi:10.1136/svn-2023-002813), 2024-02-08
Supplement: svn-2023-002813supp001_data_supplement.pdf [file svn-2023-002813supp001_data_supplement.pdf]

1 **Supplementary material**

2

3 **Supplementary Table 1.** Details of missing values and imputation status.

4 **Supplementary Figure 1.** Frequency of prior anticoagulation therapy as compared to  
5 no prior anticoagulation in patients with intracerebral hemorrhage from 2013 to 2019.

6 **Supplementary Figure 2.** Functional outcome at 3 months using modified Rankin  
7 Scale (mRS) according to prior anticoagulation therapy as compared to no prior  
8 anticoagulation in patients with intracerebral hemorrhage.

9

10

11

12

13

14

15

16

17

18

19

20

21

22

23

24

25

26

27 **Supplementary table 1.** Details of missing values and imputation status.

| Characteristic                                              | Total<br>(n=11,349)   | Switzerland<br>(n=3,500) | Norway<br>(n=7,849) | Multiple<br>imputation<br>(yes/no) |
|-------------------------------------------------------------|-----------------------|--------------------------|---------------------|------------------------------------|
|                                                             | Missing values, n (%) |                          |                     |                                    |
| <b>Demographics</b>                                         |                       |                          |                     |                                    |
| Age                                                         | 235 (2.07)            | 235 (6.71)               | 0 (0.00)            | yes                                |
| Sex                                                         | 9 (0.08)              | 9 (0.26)                 | 0 (0.00)            | yes                                |
| Country                                                     | 0 (0.00)              | 0 (0.00)                 | 0 (0.00)            | no                                 |
| <b>Risk factors</b>                                         |                       |                          |                     |                                    |
| Diabetes                                                    | 423 (3.73)            | 348 (9.94)               | 75 (0.96)           | yes                                |
| Atrial fibrillation                                         | 324 (2.85)            | 214 (6.11)               | 110 (1.40)          | yes                                |
| <b>Concomitant medication</b>                               |                       |                          |                     |                                    |
| Antiplatelets                                               | 307 (2.71)            | 279 (7.97)               | 28 (0.36)           | yes                                |
| Antihypertensives                                           | 3,490 (30.75)         | 2,722 (77.77)            | 768 (9.78)          | yes                                |
| Lipid lowering drugs                                        | 3,038 (26.77)         | 2,992 (85.49)            | 46 (0.59)           | yes                                |
| DOAC type                                                   | 173 (1.52)            | 1 (0.03)                 | 172 (2.19)          | no                                 |
| <b>Medical history</b>                                      |                       |                          |                     |                                    |
| History of ischemic stroke                                  | 258 (2.27)            | 209 (5.97)               | 49 (0.62)           | yes                                |
| History of ICH                                              | 259 (2.28)            | 210 (6.00)               | 49 (0.62)           | yes                                |
| History of coronary heart disease/<br>Myocardial infarction | 3,116 (27.46)         | 3,023 (86.37%)           | 93 (1.18)           | yes                                |
| <b>Pre-stroke disability</b>                                |                       |                          |                     |                                    |
| Pre-mRS                                                     | 3,443 (30.34)         | 2,809 (80.26)            | 634 (8.08)          | yes                                |
| <b>Clinical presentation on admission</b>                   |                       |                          |                     |                                    |
| NIHSS on admission                                          | 3,356 (29.57)         | 421 (12.03)              | 2,935 (37.39)       | yes/no <sup>a</sup>                |
| Level of consciousness at admission                         | 194 (1.71)            | 117 (3.34)               | 77 (0.98)           | yes/no <sup>b</sup>                |
| <b>Treating hospital level</b>                              |                       |                          |                     |                                    |
| Treatment at stroke center                                  | 0 (0.00)              | 0 (0.00)                 | 0 (0.00)            | no                                 |
| <b>Local management</b>                                     |                       |                          |                     |                                    |
| Treatment at high-dependency unit                           | 36 (0.32)             | 36 (1.03)                | 0 (0.00)            | yes                                |
| <b>Outcomes</b>                                             |                       |                          |                     |                                    |
| Functional outcome (mRS) at 3 months                        | 2,703 (23.82)         | 591 (16.89)              | 2,112 (26.91)       | no                                 |
| Mortality at 3 months                                       | 410 (3.61)            | 410 (11.71)              | 0 (0.00)            | no                                 |

28

29 <sup>a</sup> Not imputed for quantile (NIHSS) regression model.30 <sup>b</sup> Not imputed for binary multiple (LOC) regression model.

31 DOAC(s), direct oral anticoagulant(s); ICH, intracerebral hemorrhage; LOC, level of  
32 consciousness; mRS, modified Rankin Scale; NIHSS, National Institutes of Health  
33 Stroke Scale.

34

35 **Supplementary Figure 1.** Frequency of prior anticoagulation therapy as compared to  
36 no prior anticoagulation in patients with intracerebral hemorrhage from 2013 to 2019.  
37 (A) Combined data from Switzerland and Norway (n=11,349 patients). (B) Data from  
38 Switzerland (n=3,500 patients). (C) Data from Norway (n=7,849 patients). DOACs,  
39 direct oral anticoagulants; OACs, oral anticoagulants; VKAs, Vitamin K antagonists.

40

**A Combined data from Switzerland and Norway**

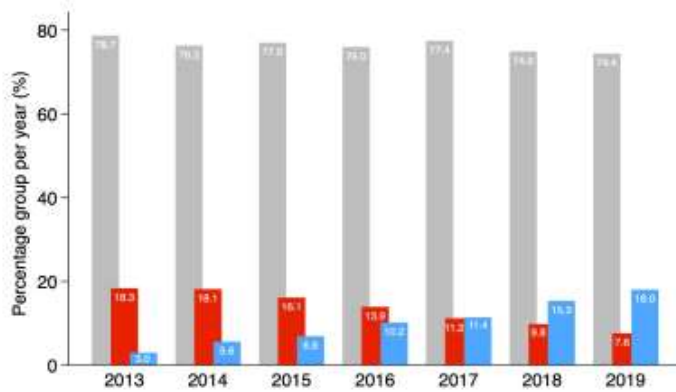

**B Switzerland**

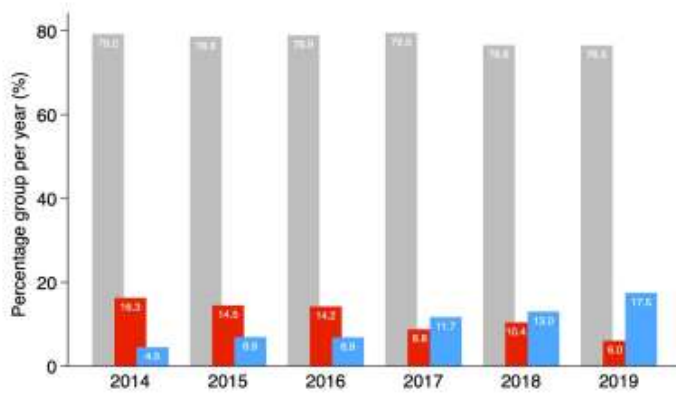

**C Norway**

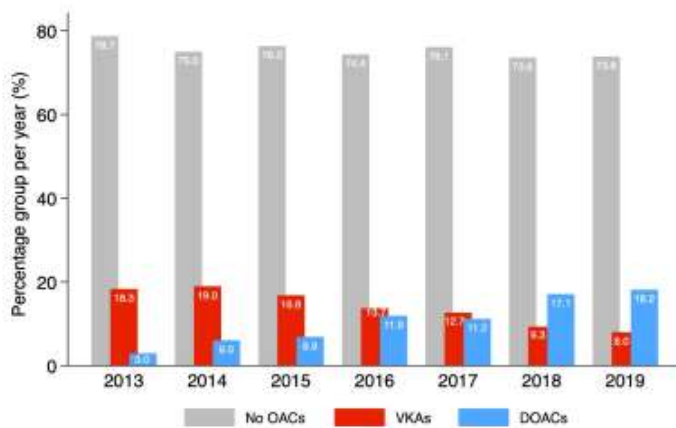

Legend: No OACs (grey), VKAs (red), DOACs (blue)

41

42

43 **Supplementary Figure 2.** Functional outcome at 3 months using modified Rankin  
 44 Scale (mRS) according to prior anticoagulation therapy as compared to no prior  
 45 anticoagulation in patients with intracerebral hemorrhage. (A) Combined data from  
 46 Switzerland and Norway (n=6,903 patients). (B) Data from Switzerland (n=2,755  
 47 patients). (C) Data from Norway (n=4,148 patients). Figure includes only sites with  
 48  $\geq 70\%$  availability of mRS at 3 months. OACs, oral anticoagulants; VKAs, Vitamin-K-  
 49 antagonists; DOACs, direct oral anticoagulants; mRS, modified Rankin Scale.

50

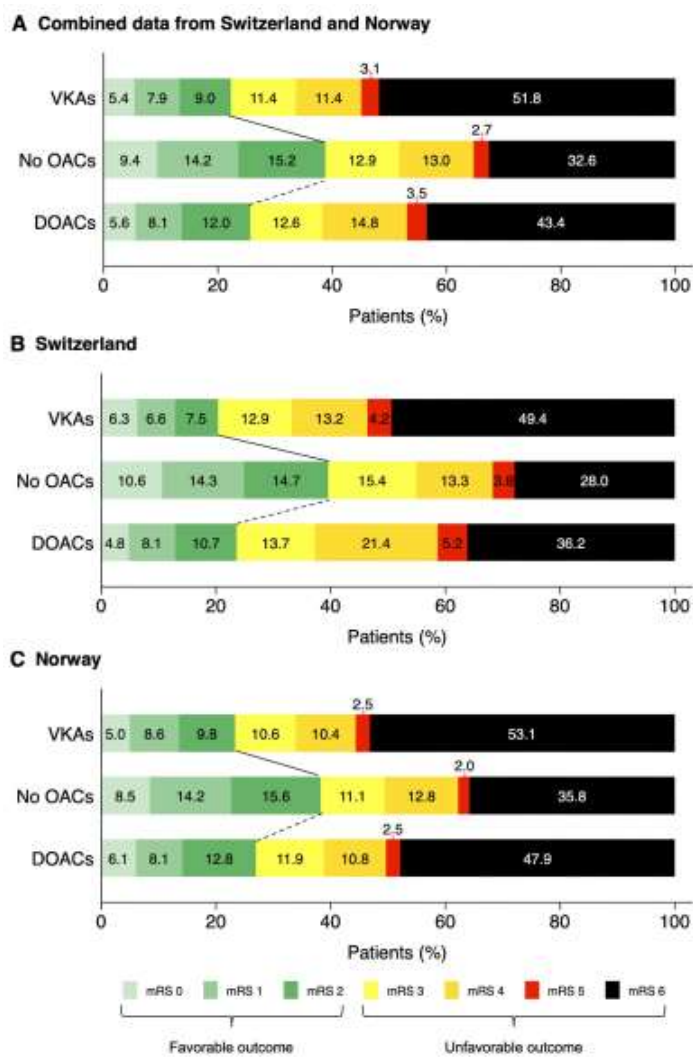

51
